# Supplementary material for: A Study of Early-Stage Corrosion Behavior of AZ91 Alloy and MAO-Coated Alloy in 3.5% NaCl Solutions
Source: MDPI journal article supplement (doi:10.3390/ma15227909), 2022-11-09
Supplement: s1 [file s1]

Supplementary Material

**Table S1.** AZ91 alloy before and after MAO treatment: fitting results from EIS measurements in 3.5% NaCl solution.

|                  | Time<br>(min) | $R_s$<br>( $\Omega\text{cm}^2$ ) | $R_C$<br>( $\Omega\text{cm}^2$ ) | $R_{CT}$<br>( $\Omega\text{cm}^2$ ) | $CPE_{DL} \times 10^{-5}$<br>( $\Omega^{-1}\text{cm}^{-2}\text{s}^n$ ) | $n_{DL}$         | $CPE_C \times 10^{-5}$<br>( $\Omega^{-1}\text{cm}^{-2}\text{s}^n$ ) | $n_{DL}$ | $R_L$<br>( $\Omega\text{cm}^2$ ) | $L$<br>( $\text{Hcm}^{-2}$ )   | $R_{ZF}$<br>( $\Omega\text{cm}^2$ ) | $\chi^2$<br>(Chi-Squared) |
|------------------|---------------|----------------------------------|----------------------------------|-------------------------------------|------------------------------------------------------------------------|------------------|---------------------------------------------------------------------|----------|----------------------------------|--------------------------------|-------------------------------------|---------------------------|
| AZ91 alloy       | 5             | 22.57<br>(2.304)                 | /                                | 1650<br>(4.767)                     | 2.885<br>(9.056)                                                       | 0.930<br>(4.76)  | /                                                                   | /        | $2.706 \times 10^5$<br>(11.8)    | $7.177 \times 10^4$<br>(8.294) | 1640                                | $1.004 \times 10^{-1}$    |
|                  | 25            | 23.87<br>(0.528)                 | /                                | 1710<br>(1.757)                     | 3.131<br>(4.720)                                                       | 0.885<br>(1.074) | /                                                                   | /        | $1.501 \times 10^3$<br>(15.67)   | $1.599 \times 10^5$<br>(14.39) | 799.3                               | $5.429 \times 10^{-3}$    |
|                  | 45            | 22.20<br>(0.981)                 | /                                | 1830<br>(2.832)                     | 5.163<br>(8.024)                                                       | 0.797<br>(3.331) | /                                                                   | /        | $9.326 \times 10^3$<br>(14.21)   | $3.120 \times 10^4$<br>(11.18) | 1430                                | $4.931 \times 10^{-2}$    |
| MAO-coated alloy | 5             | 26.33<br>(1.761)                 | $9.500 \times 10^5$<br>(11.747)  | $1.1 \times 10^7$<br>(1.704)        | 0.135<br>(3.204)                                                       | 0.599<br>(1.155) | 0.521<br>(4.034)                                                    | 1        | /                                | /                              | $1.195 \times 10^7$                 | $6.668 \times 10^{-3}$    |
|                  | 25            | 24.26<br>(2.461)                 | $6.280 \times 10^5$<br>(9.249)   | $1.193 \times 10^6$<br>(3.118)      | 0.237<br>(3.651)                                                       | 0.649<br>(1.405) | 0.646<br>(3.183)                                                    | 1        | /                                | /                              | $4.821 \times 10^6$                 | $3.224 \times 10^{-3}$    |
|                  | 45            | 19.32<br>(1.212)                 | $5.820 \times 10^5$<br>(5.019)   | $2.174 \times 10^6$<br>(2.935)      | 0.201<br>(6.762)                                                       | 0.661<br>(2.934) | 0.601<br>(3.941)                                                    | 1        | /                                | /                              | $2.756 \times 10^6$                 | $7.273 \times 10^{-4}$    |

The values in parentheses represent the fitting error (%) using Zview software.
